# Supplementary material for: MicroRNAs as potential biomarkers for the diagnosis of inflammatory bowel disease: a systematic review and meta-analysis
Source: PubMed Central journal article supplement — J Int Med Res. 2022 Apr 20;50(4):03000605221089503. doi: 10.1177/03000605221089503 (PMC9047851; doi:10.1177/03000605221089503), 2022-04-20
Supplement: sj-pdf-1-imr-10.1177_03000605221089503.pdf [file sj-pdf-1-imr-10.1177_03000605221089503.pdf]

## Supplementary Figures

### Supplementary Figure 1

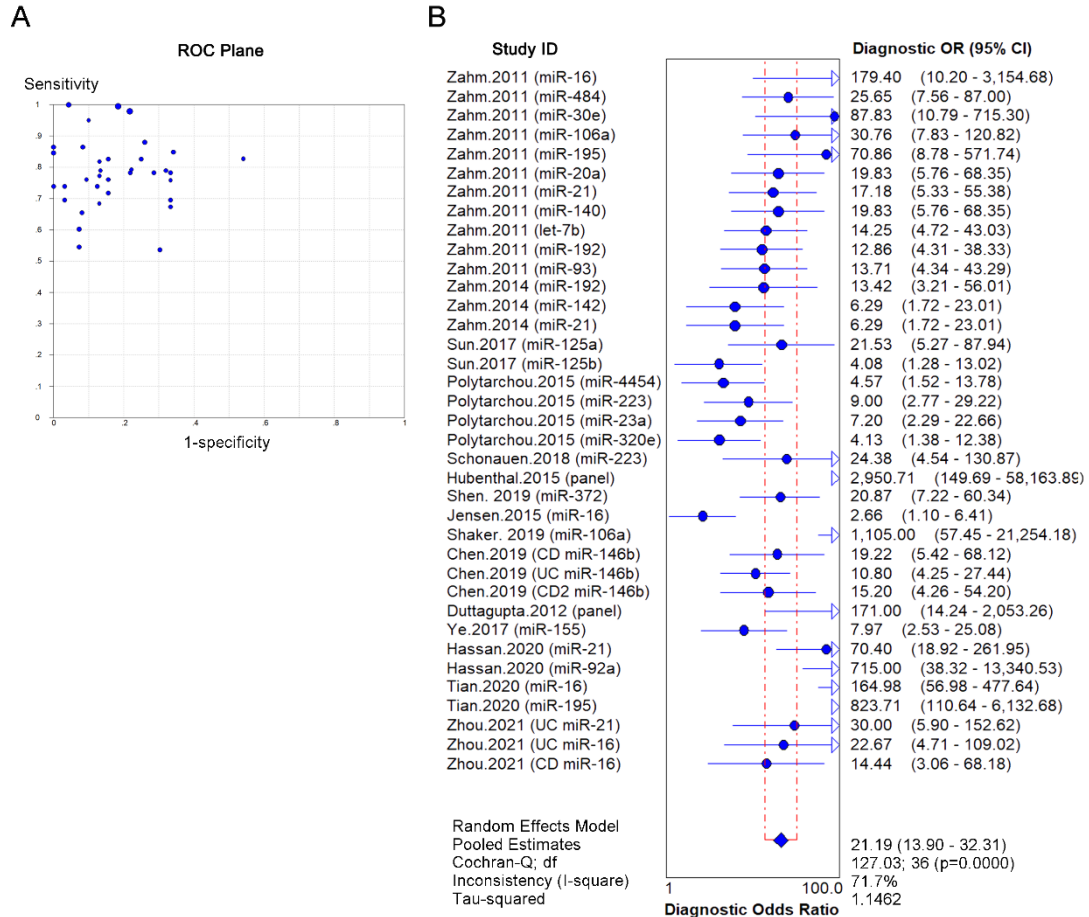

**Figure S1 Heterogeneity analysis by the ROC plane and by the diagnostic odds ratio. A, Heterogeneity analysis by the ROC plane. B, Diagnostic odds ratio of altered miRNA expression in IBD diagnosis of in all studies. ROC: receiver operating characteristic.**

Supplementary Figure 2

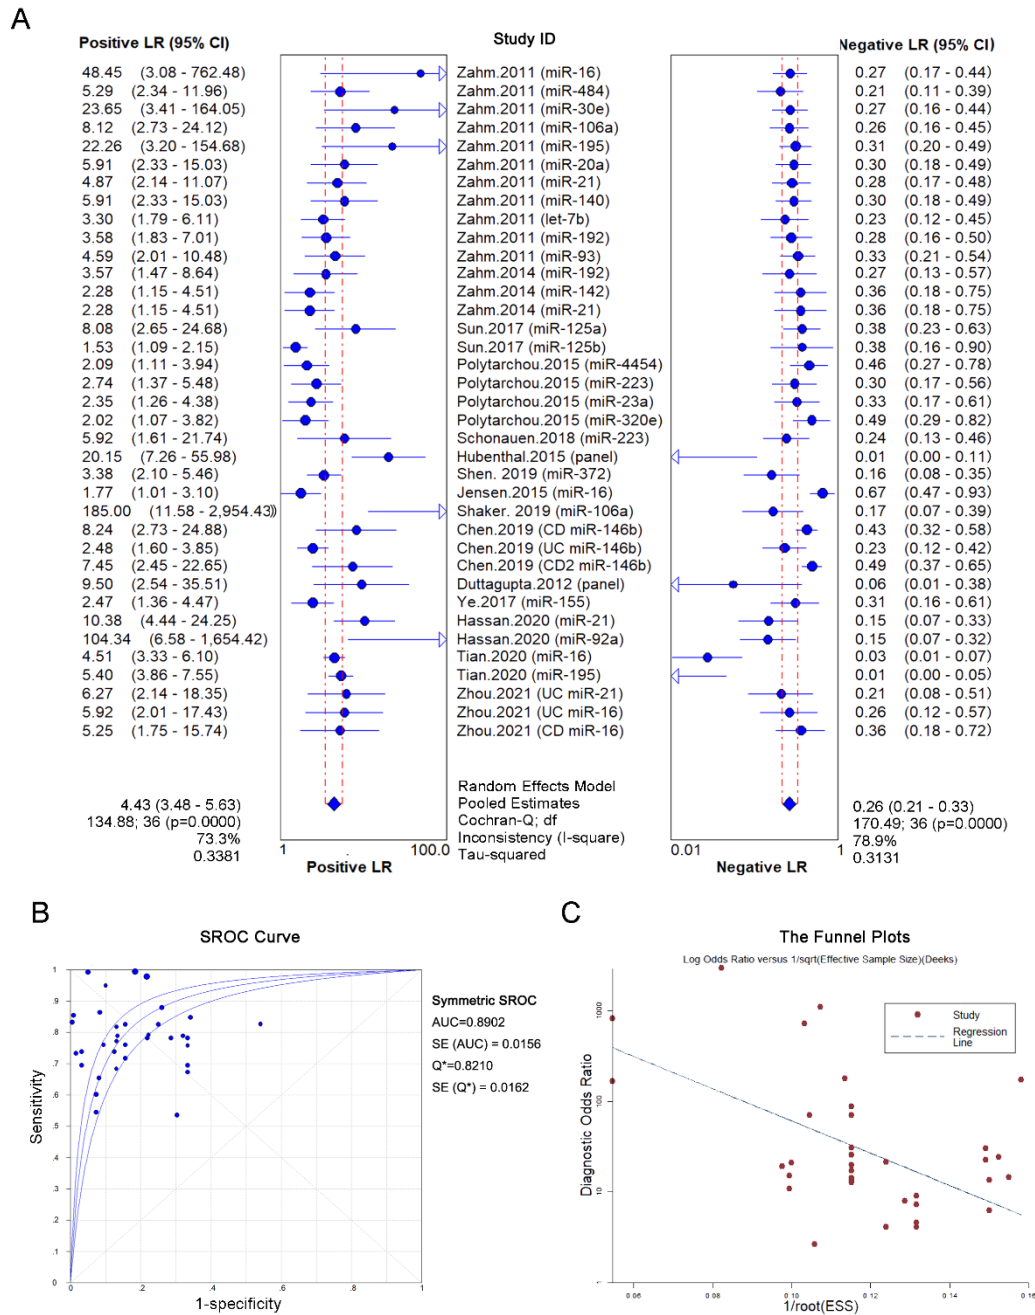

**Figure S2 Forest plot of meta-analysis of aberrant expression of microRNAs and its diagnostic value index in IBD, and publication bias assessment by Deeks' funnel plot. A, Positive likelihood ratio and negative likelihood ratio of altered miRNA expression in IBD diagnosis in all studies. B, sROC of altered miRNA expression in IBD diagnosis in all studies. C, Publication bias assessment by Deeks' funnel plot. IBD: inflammatory bowel diseases; miRNA: microRNAs; sROC: summary receiver operating characteristic.**

## Supplementary Tables

**Table S1 Text-words terms used in searching literature.**

| No. | MeSH terms/text words used                |
|-----|-------------------------------------------|
| #1  | "Inflammatory Bowel Diseases"[Mesh]       |
| #2  | "Crohn Disease"[Mesh]                     |
| #3  | "Colitis, Ulcerative"[Mesh]               |
| #4  | "Enterocolitis"[Mesh]                     |
| #5  | "Proctitis"[Mesh]                         |
| #6  | "Ileitis"[Mesh]                           |
| #7  | #1 OR #2 OR #3 OR #4 OR #5 OR #6          |
| #8  | "inflammatory bowel disease*"[All Fields] |
| #9  | crohn*[All Fields]                        |
| #10 | "ulcerative colitis"[All Fields]          |
| #11 | #8 OR #9 OR #10                           |
| #12 | #7 OR #11                                 |
| #13 | "MicroRNAs"[Mesh]                         |
| #14 | miR*[All Fields]                          |
| #15 | miRNA*[All Fields]                        |
| #16 | MicroRNA*[All Fields]                     |
| #17 | #13 OR #14 OR #15 OR #16                  |
| #18 | #12 AND #17                               |

**Table S2 Systematic review of included studies that detected altered miRNA expression in patients with IBD using miRNA microarray analysis.**

| Study ID      | Platform of miRNA microarray | miRNA probes | Expression validation | Sample from disease/control (N or pairs)                                 | Cut off | Patients with IBD |                        |                                        |             | Controls         |                        |                                        |             | Sample type | The most frequently altered miRNAs ( $\geq 4$ -fold)                                                                    |                                                                                                                                                                                                                                 | Related clinical/pathological factors |    |
|---------------|------------------------------|--------------|-----------------------|--------------------------------------------------------------------------|---------|-------------------|------------------------|----------------------------------------|-------------|------------------|------------------------|----------------------------------------|-------------|-------------|-------------------------------------------------------------------------------------------------------------------------|---------------------------------------------------------------------------------------------------------------------------------------------------------------------------------------------------------------------------------|---------------------------------------|----|
|               |                              |              |                       |                                                                          |         | Disease           | Gender % (Male/Female) | Age (y) mean $\pm$ SD/mean(range)/mean | Case number | Control          | Gender % (Male/Female) | Age (y) mean $\pm$ SD/mean(range)/mean | Case number |             | Over-expressed miRNAs                                                                                                   | Down-regulated miRNAs                                                                                                                                                                                                           |                                       |    |
| Lu Yi Wu 2017 | miRCURY LNA microRNA Array   | 36,333       | qPCR                  | 7 CD with inflammation, 7 CD without inflammation and 7 healthy controls | 2 folds | Active CD         | NA                     | NA                                     | 14          | Healthy controls | NA                     | NA                                     | 7           | Mucosa      | miR-451, miR-31, miR-144, miR-142-5p, miR-142-3p, miRPlus-A1087, miR-374a, miR-338-3p, miR-223, miR-21, miR-126, let-7a | miRPlus-E1186, miRPlus-E1028, miR-1937                                                                                                                                                                                          | NA                                    |    |
| Zhen Guo 2015 | miRCURY LNA microRNA Array   | 3100         | qPCR                  | 6 pairs CD and 6 healthy controls                                        | 2 folds | Active CD         | NA                     | NA                                     | 6           | Healthy controls | NA                     | NA                                     | 6           | Mucosa      | miR-4644, miR-4709-3p, miR-5187-3p, miR-4445-5p                                                                         | let-7g-5p, miR-101-3p, miR-141-3p, miR-145-5p, miR-192-5p, miR-200c-3p, miR-21-5p, miR-22-3p, miR-23b-3p, miR-24-3p, miR-29a-3p, miR-4286, miR-4454, miR-5701, miR-767-5p, let-7b-5p, miR-142-3p, miR-191-5p, miR-200b-3p, miR- |                                       | NA |

|                                    |                                       |     |      |                                      |         |           |             |                      |     |                  |             |              |    |        |                                                                                                                                                                    |                                        |                                    |
|------------------------------------|---------------------------------------|-----|------|--------------------------------------|---------|-----------|-------------|----------------------|-----|------------------|-------------|--------------|----|--------|--------------------------------------------------------------------------------------------------------------------------------------------------------------------|----------------------------------------|------------------------------------|
|                                    |                                       |     |      |                                      |         |           |             |                      |     |                  |             |              |    |        |                                                                                                                                                                    | 30c-5p, miR-31-5p, miR-4284            |                                    |
| <b>Ayilia Mohammedi 2018</b>       | Nanostring technology platform        | NA  | NA   | 35 CD, 46 UC and 39 healthy controls | NA      | IBD       | 49.38/50.62 | CD: 33±13, UC: 36±10 | 81  | Healthy controls | 41.03/58.97 | 56±9         | 39 | PBMC   | Non                                                                                                                                                                | Non                                    | IBD type                           |
| <b>Yahong Ji 2018</b>              | miRCURY LNA microRNA Array            | 345 | qPCR | 51 CD, 66 UC and 66 healthy controls | 4 folds | IBD       | NA          | 45.19                | 117 | Healthy controls | NA          | 49.5         | 66 | Feces  | miR-199a-5p, miR-223-3p                                                                                                                                            | miR-1226, miR-548ab, miR-515-5p        | IBD type, disease severity         |
| <b>Angelos Oikonomopoulos 2016</b> | Nanostring technology platform        | NA  | NA   | 45 CD and 21 healthy controls        | 2 folds | CD        | 51/49       | 42±14                | 45  | Healthy controls | 38/62       | 33±8         | 21 | Serum  | miR-30e-5p                                                                                                                                                         | miR-1183, miR-1286, miR-504            | Disease severity, disease location |
| <b>Feng Wu 2010</b>                | Ncode Multi-Species miRNA Microarrays | 467 | qPCR | 11 CD and 13 healthy controls        | 2 folds | Active CD | 72.73/27.27 | 36.8 (23-64)         | 11  | Healthy controls | 46.15/53.85 | 54.6 (38-68) | 13 | Mucosa | miR-21, miR-223                                                                                                                                                    | Non                                    | IBD type, location                 |
| <b>Magali Fasseu 2010</b>          | qPCR                                  | 321 | NA   | 16 CD and 10 healthy controls        | 5 folds | IBD       | 56.25/43.75 | 41.75 (20-58)        | 16  | Healthy controls | NA          | NA           | 10 | Mucosa | miR-126*, miR-29a, miR-29b, miR-324-3p, miR-127-3p, miR-196a, miR-26a, miR-34c-5p, miR-133b, miR-30b, miR-155, miR-106a, miR-22, miR-29c, miR-31, miR-150, miR-21, | miR-320a, miR-215, miR-346, miR-188-5p | IBD type, disease severity         |

|                               |                                     |      |      |                                                               |          |           |             |                                                            |    |                                                                                           |             |                                                            |    |                  |                                                                                                                                                                              |                                               |                            |
|-------------------------------|-------------------------------------|------|------|---------------------------------------------------------------|----------|-----------|-------------|------------------------------------------------------------|----|-------------------------------------------------------------------------------------------|-------------|------------------------------------------------------------|----|------------------|------------------------------------------------------------------------------------------------------------------------------------------------------------------------------|-----------------------------------------------|----------------------------|
|                               |                                     |      |      |                                                               |          |           |             |                                                            |    |                                                                                           |             |                                                            |    |                  | miR-146b-5p, miR-146a                                                                                                                                                        |                                               |                            |
| <b>M. Iborra 2013</b>         | TaqMan® human miRNA array           | 700  | qPCR | 18 CD, 18 UC and 33 healthy controls                          | 2 folds  | IBD       | 58.33/41.67 | 43.08                                                      | 36 | Healthy controls                                                                          | 54.55/45.45 | 47.3±9.6                                                   | 33 | Serum and Mucosa | miR-27a*, miR-760, miR-423-5p, miR-128, miR-196b, miR-103, miR-221, miR-532-5p, miR-15b, miR-27a                                                                             | Non                                           | IBD type, disease severity |
| <b>Tomohisa Takagi 2010</b>   | Ncode human miRNA microarrays       | 710  | qPCR | 2 active UC and 2 healthy controls                            | P < 0.05 | Active UC | 50/50       | 35±11                                                      | 2  | Healthy controls                                                                          | 50/50       | 48±11                                                      | 2  | Mucosa           | let-7a, let-7c, let-7d, let-7g, miR-21, miR-155, miR-923                                                                                                                     | Non                                           | NA                         |
| <b>Jan Van der Goten 2014</b> | Affymetrix GeneChip microRNA arrays | 4560 | qPCR | 10 active UC, 7 inactive UC and 10 healthy controls           | Top 20   | UC        | 58.82/41.18 | Active UC: 55.0 (45.3-61.3), inactive UC: 51.1 (36.1-60.4) | 17 | Edge biopsies of the ulcers from CDC patients and infectious or ischemic colitis patients | 30/70       | Active UC: 45.9 (36.1-60.1), inactive UC: 69.1 (68.2-78.4) | 10 | Mucosa           | miR-1971, miR-665, miR-27a-5p, miR-885-3p, miR-3162-5p, miR-31-5p, miR-650, miR-140-5p, miR-223-3p, miR-708-5p, miR-3201, miR-133a, miR-1973, miR-429, miR-196b-3p, miR-147b | miR-422a, miR-141-3p, miR-192-3p, miR-148a-3p | Disease severity           |
| <b>Amy Lewis 2015</b>         | miScript miRNA PCR 384HC array      | NA   | qPCR | 6 stricturing CD, 11 nonstricturing CD and 5 healthy controls | NA       | CD        | NA          | NA                                                         | 17 | Healthy controls                                                                          | NA          | NA                                                         | 5  | Serum            | Non                                                                                                                                                                          | Non                                           | NA                         |

|                               |                                      |          |      |                                      |           |             |           |              |    |                        |           |              |    |        |                                                                                                                                                                                                                                       |                                      |                                                      |
|-------------------------------|--------------------------------------|----------|------|--------------------------------------|-----------|-------------|-----------|--------------|----|------------------------|-----------|--------------|----|--------|---------------------------------------------------------------------------------------------------------------------------------------------------------------------------------------------------------------------------------------|--------------------------------------|------------------------------------------------------|
| <b>Min Min 2014</b>           | Human v2.0 miRNA Expression BeadChip | 1146     | qPCR | 20 active UC and 16 healthy controls | 1 fold    | Active UC   | 75/25     | 42.6±12.4    | 20 | Healthy controls       | 62.5/37.5 | 52.2±10.0    | 16 | Mucosa | miR-658                                                                                                                                                                                                                               | Non                                  | NA                                                   |
| <b>Swati Valmiki 2017</b>     | GeneChip © miRNA 4.0 Array           | NA       | qPCR | 8 UC and 8 non-IBD controls          | 1.5 folds | UC          | 37.5/62.5 | 39.75±10.29  | 8  | NIBD-related illnesses | 25/75     | 40.75±11.86  | 8  | Mucosa | miR-138-5p, miR-708-5p, miR-212-3p, miR-4538, miR-4521, miR-4417, miR-17-3p, miR-424-3p, miR-874-3p, miR-25-5p, miR-223-3p, miR-1271-5p, miR-148b-3p, miR-501-5p, miR-4486, miR-224-3p, miR-21-3p, miR-146b-5p, miR-149-5p, miR-31-5p | miR-552-3p, miR-196b-5p, miR-378d-5p | NA                                                   |
| <b>Jeremy S Schaefer 2015</b> | miRCURY LNA microRNA Array           | over 600 | qPCR | 2 CD, 2 UC and 1 healthy control     | 3 folds   | IBD         | NA        | NA           | 4  | Healthy controls       | NA        | NA           | 1  | Mucosa | miR-31, miR-494                                                                                                                                                                                                                       | Non                                  | NA                                                   |
| <b>Bailey C. E. Peck 2015</b> | Illumina HiSeq 2500 platform         | NA       | qPCR | 21 CD, 6 UC and 14 healthy controls  | 2 folds   | Inactive CD | 33/67     | 36.6 (15-76) | 21 | NIBD-related illnesses | 57/43     | 56.4 (41-82) | 14 | FFPE   | NA                                                                                                                                                                                                                                    | NA                                   | Disease subclass (about stricturing and penetrating) |
| <b>Mehmet Cosk</b>            | NA                                   | NA       | qPCR | 4 CD, 4 UC and 2                     | NA        | IBD         | 50/50     | 37 (25-73)   | 8  | Healthy controls       | 50/50     | 39 (37-41)   | 2  | Mucosa | miR-15a, miR-199b-3p, miR-20b, miR-20a, miR-106b, miR-                                                                                                                                                                                | Non                                  | IBD type, diseases                                   |

|                                            |                                                                  |    |      |                                                 |              |              |    |    |    |                                                  |    |    |    |        |                                                                                                                                                                                                                                                                                                                                                       |            |                             |
|--------------------------------------------|------------------------------------------------------------------|----|------|-------------------------------------------------|--------------|--------------|----|----|----|--------------------------------------------------|----|----|----|--------|-------------------------------------------------------------------------------------------------------------------------------------------------------------------------------------------------------------------------------------------------------------------------------------------------------------------------------------------------------|------------|-----------------------------|
| <b>un<br/>2013</b>                         |                                                                  |    |      | healthy<br>controls                             |              |              |    |    |    |                                                  |    |    |    |        | 27b, miR-99a, miR-222, miR-151-5p, miR-203, miR-30a, miR-25, miR-26b, miR-646, miR-125b, miR-98, miR-768-3p, miR-195, miR-99b, miR-23a, miR-18a, miR-17, miR-155, miR-23b, miR-1201, miR-130a, miR-199a-3p, miR-16, miR-126, miR-106a, miR-1248, miR-27a, miR-222*, miR-506, miR-125b-1*, let-7e*, miR-512-5p, miR-1288, miR-330-3p, miR-623, miR-34b |            | e<br>severit<br>y           |
| <b>María<br/>Rojas<br/>-Feria<br/>2018</b> | NA                                                               | 88 | qPCR | NA                                              | 1.5<br>folds | Active<br>CD | NA | NA | 17 | Paired<br>adjacent<br>normal<br>colon<br>tissues | NA | NA | 18 | Mucosa | miR-144, miR-519                                                                                                                                                                                                                                                                                                                                      | Non        | Gut<br>microbi<br>ota       |
| <b>Zhen<br/>Guo<br/>2016</b>               | miRCURY<br>LNA<br>microRNA<br>Array                              | NA | qPCR | 6 pairs<br>CD and<br>6<br>healthy<br>controls   | 2<br>folds   | Active<br>CD | NA | NA | 6  | Healthy<br>controls                              | NA | NA | 6  | Mucosa | Non                                                                                                                                                                                                                                                                                                                                                   | miR-192-5p | NA                          |
| <b>Jingm<br/>ei Lin<br/>2016</b>           | Illumina<br>next<br>generation<br>sequencin<br>g of small<br>RNA | NA | qPCR | 9 CD, 10<br>UC and<br>18<br>healthy<br>controls | 2<br>folds   | IBD          | NA | NA | 19 | Healthy<br>controls                              | NA | NA | 18 | Mucosa | miR-194-2, miR-383,<br>miR-615                                                                                                                                                                                                                                                                                                                        | Non        | Diseas<br>e<br>severit<br>y |



|                                    |                                     |                               |      |                                      |                                                |           |             |                   |     |                                      |             |                  |    |        |                                     |                                                       |                            |
|------------------------------------|-------------------------------------|-------------------------------|------|--------------------------------------|------------------------------------------------|-----------|-------------|-------------------|-----|--------------------------------------|-------------|------------------|----|--------|-------------------------------------|-------------------------------------------------------|----------------------------|
| <b>Geoffrey W. Krissansen 2015</b> | NA                                  | 289                           | qPCR | 57 CD, 62 UC and 58 healthy controls | 2 folds                                        | IBD       | 50.42/49.58 | 40 (16-74)        | 119 | Healthy controls                     | 44.83/55.17 | 43.7 (19-67)     | 58 | Serum  | miR-595, miR-143, miR-1246          | Non                                                   | IBD type, disease severity |
| <b>Feng Wu 2011</b>                | miRCURY LNA microRNA Array          | 1300                          | qPCR | 19 CD, 23 UC and 13 healthy controls | miRNA signal > mean $\pm$ 2 SD of the controls | IBD       | 47.62/52.38 | 46.5 (21-81)      | 42  | Healthy controls                     | 46.2/53.8   | 56.3 (43-75)     | 13 | Blood  | miR-362-3p                          | miR-505*                                              | IBD type, disease severity |
| <b>Raju Ranjha 2015</b>            | miRCURY LNA microRNA Array          | NA                            | qPCR | 30 UC and 20 non-IBD controls        | 1.7 folds                                      | UC        | 56.7/43.3   | 34.84 $\pm$ 13.75 | 30  | NIBD-related illnesses               | 65/35       | 34.23 $\pm$ 13.1 | 20 | Mucosa | miR-141-3p                          | Non                                                   | Location                   |
| <b>Georgios Koukos 2015</b>        | miRCURY LNA microRNA Array          | NA                            | qPCR | 5 pairs UC                           | NA                                             | UC        | 40/60       | 15.2 $\pm$ 1.83   | 5   | Paired adjacent normal colon tissues | 40/60       | 15.2 $\pm$ 1.83  | 5  | Mucosa | miR-223, miR-1973, miR-3611, miR-21 | miR-4284, miR-378a/c/d, miR-378a, miR-138-1, miR-4286 | Age                        |
| <b>Jing Han 2018</b>               | miRCURY LNA microRNA Array          | NA                            | qPCR | 3 UC and 3 healthy controls          | NA                                             | Active UC | NA          | NA                | 3   | Healthy controls                     | NA          | NA               | 3  | Mucosa | Non                                 | Non                                                   | NA                         |
| <b>Karen Dubois-Cama</b>           | Affymetrix GeneChip microRNA arrays | more than 5,000 mature miRNAs | qPCR | 8 pairs UC                           | 1.5 folds                                      | Active UC | 37.5/62.5   | 34 (18-44)        | 8   | Paired adjacent normal colon tissues | 37.5/62.5   | 34 (18-44)       | 8  | Mucosa | miR-223-3p, miR-708-5p              | miR-147b, hsa-miR-196b-3p                             | Disease severity           |

|                                   |                                          |     |      |                                            |           |             |             |              |    |                  |             |              |    |                                         |                                                                       |                                                            |                  |
|-----------------------------------|------------------------------------------|-----|------|--------------------------------------------|-----------|-------------|-------------|--------------|----|------------------|-------------|--------------|----|-----------------------------------------|-----------------------------------------------------------------------|------------------------------------------------------------|------------------|
| <b>cho 2019</b>                   |                                          |     |      |                                            |           |             |             |              |    |                  |             |              |    |                                         |                                                                       |                                                            |                  |
| <b>Ayilia Mohammedi 2019</b>      | Nanostring technology platform           | 798 | Non  | 23 quiescent CD and 38 healthy controls    | P < 0.05  | Inactive CD | 34.78/64.22 | 34±13        | 23 | Healthy controls | 57.89/42.11 | 55±9         | 38 | Mucosa                                  | Non                                                                   | Non                                                        | Location         |
| <b>Julien Verrier 2020</b>        | nCounter human v2 miRNA Expression Assay | 800 | qPCR | 6 CD and 6 healthy controls                | P < 0.05  | Active CD   | 83/17       | 37.6 (27-69) | 6  | Healthy controls | 83/17       | 36.8 (25-73) | 6  | Feces                                   | miR-223, miR-1246, miR-451, miR-21, miR-15a, miR-15b                  | Non                                                        | Disease severity |
| <b>Filip Ambrózkiwicz 2020</b>    | Nanostring technology platform           | 800 | Non  | 15 CD and 9 healthy controls               | 1.5 folds | CD          | 66.7/33.3   | 32 (20-62)   | 15 | Healthy controls | NA          | NA           | 9  | Feces                                   | miR-223-3p                                                            | miR-577, miR-642a-3p, miR-26b-5p                           | Disease severity |
| <b>Christian T. Wohnhaas 2020</b> | Nanostring technology platform           | 555 | qPCR | 52 CD and 15 healthy controls              | 3.0 folds | CD          | 25/75       | 38 (19-74)   | 52 | Healthy controls | 53.3/46.7   | 38 (23-65)   | 15 | Feces                                   | miR-16-5p, miR-142-5p, miR-223-3p                                     | miR-10b-5p, miR-192-5p, miR-10a-5p, miR-375                | Disease severity |
| <b>Jie Zhao 2020</b>              | Agilent Human miRNA Microarray           | NA  | qPCR | 3 CD and 3 healthy controls                | 4.0 folds | CD          | NA          | 54.3±4.8     | 3  | Healthy controls | NA          | 54.1±5.1     | 3  | Mucosa                                  | miR-130a-3p, miR-106b-5p, miR-30b-5p                                  | Non                                                        | NA               |
| <b>Kalla R 2021</b>               | miRCURY LNA microRNA Array               | 340 | qPCR | 9 CD, 14 UC, 1 IBDU and 8 healthy controls | NA        | IBD         | 66.67/33.33 | 34 (18-68)   | 24 | Healthy controls | 50/50       | 43 (20-59)   | 8  | Leucocytes (CD4+, CD8+ and CD14+ cells) | CD4+ cells: miR-4792, miR-921, CD8+ cells: miR-4792, CD14+ cells: non | CD4+ cells: non, CD8+ cells: miR-200b-3p, CD14+ cells: non | NA               |

miRNA: microRNAs; IBD: Inflammatory bowel disease; UC: Ulcerative colitis; CD: Crohn's disease; y: years; SD: Standard deviation; PBMC: Peripheral blood mononuclear cell; FFPE: Formalin-fixed paraffin-embedded; qPCR: Quantitative real-time polymerase chain reaction; NA: Not available; Non: None of valid data.

**Table S3 Systematic review of included studies that detected altered miRNA expression in patients with IBD using validated methods.**

| Study ID                      | Patients with IBD |                        |                                  |                | Controls                             |                        |                                  |                | Sample type      | miRNA assay | Normalization controls | No. of miRNAs | Up or down | miRNA studied                                     | Target        | Related clinicopathological factors |
|-------------------------------|-------------------|------------------------|----------------------------------|----------------|--------------------------------------|------------------------|----------------------------------|----------------|------------------|-------------|------------------------|---------------|------------|---------------------------------------------------|---------------|-------------------------------------|
|                               | Disease           | Gender % (Male/Female) | Age (y) mean±SD/mean(range)/mean | Case number    | Control                              | Gender % (Male/Female) | Age (y) mean±SD/mean(range)/mean | Case number    |                  |             |                        |               |            |                                                   |               |                                     |
| <b>Benjamin P. Keith 2018</b> | CD                | 50.22/49.78            | 26.85±20.27                      | 229            | Non-IBD                              | NA                     | NA                               | 187            | Mucosa           | qPCR        | RNU48                  | 1             | Up         | miR-31                                            | NA            | Disease location, ileal stricturing |
| <b>Georgios Koukos 2013</b>   | IBD               | NA                     | Adult and children               | 33             | Non-IBD                              | NA                     | NA                               | 12             | Mucosa           | qPCR        | U6                     | 1             | Down       | miR-124                                           | STAT3         | Age, IBD type, disease severity     |
| <b>Hye-Youn Kim 2016</b>      | Active UC and CD  | NA                     | NA                               | 10             | Healthy controls                     | NA                     | NA                               | 5              | Mucosa           | qPCR        | U6                     | 2             | Up         | miR-132, miR-223                                  | FOXO3a        | IBD type                            |
| <b>Mao Cai 2017</b>           | Active UC         | 66.67/33.33            | 50.4±13.8                        | 15             | Healthy controls                     | 69.23/30.78            | 43.1±11.2                        | 13             | Mucosa           | qPCR        | U6                     | 1             | Down       | miR-141                                           | CXCL5         | NA                                  |
| <b>Jing Han 2018</b>          | Active UC         | NA                     | NA                               | NA             | Healthy controls                     | NA                     | NA                               | NA             | Mucosa           | qPCR        | NA                     | 1             | Up         | miR-142-5p                                        | SOCS1         | NA                                  |
| <b>Zhen Huang 2014</b>        | Active CD         | NA                     | NA                               | 15             | Paired adjacent normal colon tissues | NA                     | NA                               | 15             | Mucosa           | qPCR        | U6                     | 1             | Down       | miR-141                                           | CXCL12β       | Histological score                  |
| <b>Guodong Chen 2015</b>      | Active UC         | 42.86/57.14            | 42.5                             | 35             | Healthy controls                     | 50/50                  | 34±8.9                           | 10             | Mucosa and serum | qPCR        | U6                     | 1             | Down       | miR-195                                           | Smad7         | Steroid resistance                  |
| <b>Nina Zidar 2016</b>        | Active UC and CD  | UC: 40/60, CD: 40/60   | UC: 50.6±18.2, CD: 41.7±13.1     | UC: 10, CD: 10 | Paired macroscopically normal mucosa | 40/60                  | UC: 50.6±18.2, CD: 41.7±13.1     | UC: 10, CD: 10 | Surgery tissue   | qPCR        | U6                     | 5             | Down       | miR-141, miR-200a, miR-200b, miR-200c and miR-429 | NA            | IBD type                            |
| <b>Ye Zhao 2016</b>           | Active CD         | 65/35                  | 32.05±10.59                      | 20             | Healthy controls                     | 75/25                  | 35.1±15.68                       | 20             | Mucosa           | qPCR        | U6                     | 4             | Up or down | Up: miR-124, miR-9, down: miR-145, miR-143        | AHR (miR-124) | NA                                  |

|                                         |                  |                              |                                |                |                                                                            |                            |                          |                                          |                                                                |           |       |   |    |          |       |                  |
|-----------------------------------------|------------------|------------------------------|--------------------------------|----------------|----------------------------------------------------------------------------|----------------------------|--------------------------|------------------------------------------|----------------------------------------------------------------|-----------|-------|---|----|----------|-------|------------------|
| <b>Huixia Zhang 2018</b>                | Active UC        | NA                           | NA                             | 23             | Healthy controls, IBS                                                      | NA                         | NA                       | 20                                       | Mucosa                                                         | qPCR      | U6    | 1 | Up | miR-15   | A2aAR | NA               |
| <b>Chen Zhang 2014</b>                  | Active UC and CD | UC: 72.2/27.8, CD: 61.5/38.5 | UC: 46 (19-74), CD: 41 (16-68) | UC: 36, CD: 26 | Diverticular disease                                                       | 73.7/26.3                  | 50 (23-87)               | 38                                       | FFPE                                                           | qPCR      | U6    | 1 | Up | miR-31   | NA    | IBD type         |
| <b>Bin Zhang 2017</b>                   | IBD              | NA                           | NA                             | NA             | Paired adjacent normal colon tissues                                       | NA                         | NA                       | NA                                       | Surgery tissue                                                 | qPCR      | NA    | 1 | Up | miR-122a | EGFR  | NA               |
| <b>Yongzhi Yang 2013</b>                | UC               | 46.67/53.33                  | 39.4 (20-65)                   | 15             | Healthy controls                                                           | 53.33/46.67                | 44.5 (23-67)             | 15                                       | Mucosa                                                         | qPCR, ISH | U6    | 1 | Up | miR-21   | RhoB  | NA               |
| <b>Xue Yang 2018</b>                    | Active UC and CD | NA                           | NA                             | UC: 32, CD: 35 | ①Healthy controls, ②inactive IBD and ③paired adjacent normal colon tissues | NA                         | NA                       | ①43, ②UC: 28, CD: 29 and ③UC: 32, CD: 35 | Mucosa, PBMC                                                   | qPCR      | U6    | 1 | Up | miR-425  | Foxo1 | Disease severity |
| <b>Weiyun Wu 2017</b>                   | Active UC        | NA                           | NA                             | 26             | Healthy controls                                                           | NA                         | NA                       | 19                                       | Mucosa                                                         | qPCR      | U6    | 1 | Up | miR-206  | A3AR  | NA               |
| <b>Simon R Whiteoak 2018 (Cohort 1)</b> | Active UC        | 52/48                        | 49 (36-62)                     | 25             | ①Healthy controls, ②inactive UC patients                                   | ④47.62/52.38, ⑤53.33/46.67 | ⑥59 (49-66), ⑦55 (49-66) | ⑧21, ⑨19                                 | Mucosa                                                         | qPCR      | RNU44 | 1 | Up | miR-31   | TSLP  | Disease severity |
| <b>Simon R Whiteoak 2018 (Cohort 2)</b> | Active UC        | 25/75                        | 53 (46-62)                     | 4              | Healthy controls                                                           | 25/75                      | 76 (61-89)               | 4                                        | Mucosal lymphocytes                                            | qPCR      | RNU44 | 1 | Up | miR-31   | TSLP  | NA               |
| <b>Simon R Whiteoak 2018 (Cohort 3)</b> | Active UC        | 80/20                        | 50 (31-66)                     | 5              | Healthy controls                                                           | 66.67/33.33                | 64 (35-71)               | 6                                        | Blood (CD4 <sup>+</sup> C D25 <sup>intermediate</sup> T cells) | qPCR      | RNU44 | 1 | Up | miR-31   | TSLP  | NA               |

|                                    |                  |                                  |                                  |                 |                                                                                                            |                          |                         |                                         |                                 |                          |                                                                          |        |    |                                             |        |                            |
|------------------------------------|------------------|----------------------------------|----------------------------------|-----------------|------------------------------------------------------------------------------------------------------------|--------------------------|-------------------------|-----------------------------------------|---------------------------------|--------------------------|--------------------------------------------------------------------------|--------|----|---------------------------------------------|--------|----------------------------|
| <b>Gorm Thorlacius-Ussing 2017</b> | Active UC and CD | UC: 40/60, CD: 87.5/12.5         | UC: 46.1 (32-67), CD: 54 (29-77) | UC: 10, CD: 8   | Healthy controls                                                                                           | 55.56/44.44              | 54.2 (26-83)            | 9                                       | FFPE                            | ⓪qPCR, ⓪Quantitative ISH | ⓪U6, hsa-let-7a-5p, hsa-miR-103a-3p, and hsa-miR-191-5p, ⓪scramble probe | ⓪3, ⓪2 | Up | ⓪miR-21, miR-126, miR-223, ⓪miR-21, miR-126 | NA     | IBD type                   |
| <b>Wen-Juan Tang 2018</b>          | Active UC and CD | UC: 57.14/42.86, CD: 52.63/47.37 | UC: 9.74±2.96, CD: 10.76±3.25    | UC: 7, CD: 19   | ⓪Juvenile polyps, ⓪Inactive CD patients                                                                    | ⓪57.14/42.86⓪57.14/42.86 | ⓪9.57±3.51, ⓪11.86±3.25 | ⓪21, ⓪7                                 | Mucosa                          | qPCR                     | U6                                                                       | 1      | Up | miR-15a                                     | Cdc42  | IBD type, disease severity |
| <b>Dániel Szűcs 2016</b>           | Active CD        | 80/20                            | 12.11±1.63                       | 10              | ⓪Non-IBD, ⓪inactive CD patients                                                                            | ⓪80/20, ⓪50/50           | ⓪8.75±2.36, ⓪12.4±1.52  | ⓪10, ⓪10                                | Mucosa                          | qPCR                     | U6                                                                       | 3      | Up | miR-146a, miR-155, miR-122                  | NA     | Disease severity           |
| <b>Magali Svrcek 2013</b>          | IBD              | 50/50                            | 37 (19-78)                       | 18 (24 samples) | Healthy mucosa from patients with diverticulitis                                                           | 30/70                    | 58.6 (24-81)            | 20                                      | Mucosa                          | qPCR                     | RNU48                                                                    | 3      | Up | miR-155, miR-21, miR-423-5p                 | NA     | CRC                        |
| <b>Xu-Feng Pei 2018</b>            | IBD              | UC: 46.30/53.70, CD: 53.33/46.67 | UC: 36.51±8.14, CD: 33.58 ± 7.36 | UC: 54, CD: 45  | Healthy mucosa from patients with diverticulitis; peripheral venous blood was taken from healthy examinees | 53.33/46.67; NA          | 35.14±6.45, NA          | Mucosa: 15, peripheral venous blood: 20 | Mucosa and blood (CD4+ T cells) | qPCR                     | U6                                                                       | 1      | Up | miR-22                                      | HDAC 4 | IBD type, disease severity |
| <b>Surajit Pathak 2015</b>         | Active UC and CD | UC: 37.5/62.                     | UC: 42 (24-71),                  | UC: 8, CD: 8    | Healthy controls                                                                                           | 50/50                    | 55 (27-69)              | 8                                       | Mucosa (intestinal)             | qPCR                     | U6                                                                       | 1      | Up | miR-155                                     | SOCS 1 | NA                         |

|                                  |                  |                                                |                                        |                 |                                                                      |                 |                             |                     |                                 |      |    |    |    |                                                                                                                                                                                                       |       |                                  |
|----------------------------------|------------------|------------------------------------------------|----------------------------------------|-----------------|----------------------------------------------------------------------|-----------------|-----------------------------|---------------------|---------------------------------|------|----|----|----|-------------------------------------------------------------------------------------------------------------------------------------------------------------------------------------------------------|-------|----------------------------------|
|                                  |                  | 5, CD:<br>50/50                                | CD:39<br>(28-64)                       |                 |                                                                      |                 |                             |                     | fibroblasts and myofibroblasts) |      |    |    |    |                                                                                                                                                                                                       |       |                                  |
| <b>Archanioti Paraskevi 2012</b> | Active UC and CD | UC:<br>47.73/52<br>.27, CD:<br>44.53/55<br>.47 | UC:<br>33.36±11.23, CD:<br>30.72±10.61 | UC: 88, CD: 128 | Healthy controls                                                     | 46.92/53<br>.08 | 44.52±8.64                  | 162                 | Blood                           | qPCR | U6 | 19 | Up | UC: miR-16, miR-21, miR-28-5p, miR-143, miR-151-5p, miR-155, miR-199a-5p, CD: miR-16, miR-23a, miR-28-5p, miR-29a, miR-106a, miR-107, miR-126, miR-191, miR-199a-5p, miR-200c, miR-362-3p, miR-532-3p | NA    | IBD type                         |
| <b>Ameneh Omidbakhsh 2018</b>    | IBD              | UC:<br>53.12/46<br>.88, CD:<br>53.12/46<br>.88 | UC:<br>31.53±12.28, CD:<br>32.45±11.3  | UC: 32, CD: 32  | Healthy controls                                                     | 53.12/46<br>.88 | 33.47±10.92                 | 32                  | Blood                           | qPCR | U6 | 2  | Up | miR-106a, miR-362-3p                                                                                                                                                                                  | NA    | IBD type, disease severity       |
| <b>Alexandru V. Olaru 2011</b>   | IBD              | 68.57/34<br>.43                                | 46.2                                   | 35              | Normal mucosa from patients without IBD or colorectal cancer history | 85.71/14<br>.29 | 60.6                        | 14                  | Mucosa                          | qPCR | U6 | 1  | Up | miR-31                                                                                                                                                                                                | FIH-1 | Disease severity, neoplasia, CRC |
| <b>Viola Neudecker 2017</b>      | Active UC and CD | NA                                             | UC:51.5, CD: 36.7                      | UC: 6, CD: 6    | ①Healthy controls, ②inactive                                         | NA              | ①51.4, ② UC: 47.8, CD: 47.5 | ①10, ② UC: 6, CD: 4 | Mucosa                          | qPCR | U6 | 1  | Up | miR-223                                                                                                                                                                                               | NA    | IBD type, disease severity       |

|                                        |                  |             |               |                | patients with IBD                    |       |              |    |                                                                                              |      |         |   |            |                                                                                   |                |                                   |
|----------------------------------------|------------------|-------------|---------------|----------------|--------------------------------------|-------|--------------|----|----------------------------------------------------------------------------------------------|------|---------|---|------------|-----------------------------------------------------------------------------------|----------------|-----------------------------------|
| <b>Hang Thi Thu Nguyen 2014</b>        | IBD              | NA          | NA            | UC: 20, CD: 20 | Non-IBD                              | NA    | NA           | 13 | Mucosa                                                                                       | qPCR | NA      | 2 | Up         | miR-130c, miR-130a                                                                | NA             | IBD type, disease severity        |
| <b>Mousa Mohammadni a-Afrouzi 2016</b> | UC               | 46.67/53.33 | 37.26±9.59    | 30             | Healthy controls                     | 50/50 | 36.90±10.61  | 30 | Blood (CD4 <sup>+</sup> C D25 <sup>+</sup> CD127 <sup>-</sup> FoxP3 <sup>+</sup> Treg cells) | qPCR | RNU48   | 8 | Up or down | Up: miR-29b, miR-31, miR-181a, down: miR-21, miR-29a, miR-146a, miR-155, miR-181c | NA             | NA                                |
| <b>Carlos D. Minacapelli 2019</b>      | Active UC        | 53.33/46.67 | 41.73 (23-64) | 15             | Healthy controls                     | 60/40 | 40.8 (42-65) | 5  | Mucosa                                                                                       | qPCR | β-actin | 1 | Up         | miR-206                                                                           | NA             | Efficacy of 5-aminosalicylic acid |
| <b>Friederike Cordes 2016</b>          | CD               | NA          | 38 (20-55)    | 15             | Healthy controls                     | NA    | 30 (18-65)   | 13 | Blood                                                                                        | qPCR | U6      | 1 | Up         | miR-320a                                                                          | PPP2R5B, JAM-A | Disease severity                  |
| <b>Weixu Chen 2014</b>                 | Active CD        | NA          | NA            | 10             | Healthy controls                     | NA    | NA           | 10 | Mucosa                                                                                       | qPCR | U6      | 1 | Up         | miR-124                                                                           | AHR            | NA                                |
| <b>Shameer J. Mehta 2018</b>           | CD               | 50/50       | 36.02         | 42             | Healthy controls                     | NA    | NA           | 13 | Serum                                                                                        | qPCR | U6      | 4 | Down       | miR - 141, miR - 200a, miR - 200b and miR - 200c                                  | ZEB1           | Strictureing                      |
| <b>Nitsan Maharshak 2013</b>           | IBD              | 34/66       | 13.45±39.9    | 33             | Healthy controls                     | 44/56 | 7.93±51.2    | 16 | Mucosa                                                                                       | qPCR | SNO135  | 1 | Up         | miR-132                                                                           | AChE           | Disease severity                  |
| <b>Dan Ma 2019</b>                     | Active UC and CD | NA          | NA            | 16             | Paired adjacent normal colon tissues | NA    | NA           | 11 | Mucosa                                                                                       | qPCR | U6      | 1 | Down       | miR-185-3p                                                                        | MLCK           | NA                                |
| <b>Jin-an Li 2017</b>                  | UC               | NA          | NA            | 24             | Healthy controls                     | NA    | NA           | 20 | Mucosa                                                                                       | qPCR | U6      | 1 | Down       | miR-214-3p                                                                        | STAT6          | NA                                |

|                             |                        |                                                |                                       |                   |                                                                                                                       |                 |                  |                   |                        |      |                        |   |               |                                                                      |                         |                                  |
|-----------------------------|------------------------|------------------------------------------------|---------------------------------------|-------------------|-----------------------------------------------------------------------------------------------------------------------|-----------------|------------------|-------------------|------------------------|------|------------------------|---|---------------|----------------------------------------------------------------------|-------------------------|----------------------------------|
| <b>Ying Kang 2016</b>       | IBD                    | UC:<br>57.14/42<br>.86, CD:<br>54.05/45<br>.95 | UC:<br>41.6±10.<br>4, CD:<br>38.3±9.2 | UC: 63,<br>CD: 37 | Healthy<br>controls                                                                                                   | 59.52/40<br>.48 | 40.5±12.4        | 42                | Mucosa<br>and<br>serum | qPCR | U6                     | 1 | Up            | miR-595                                                              | NCAM<br>1,<br>FGFR<br>2 | IBD type,<br>disease<br>severity |
| <b>Chong He 2016</b>        | IBD                    | NA                                             | NA                                    | UC: 66,<br>CD: 72 | Healthy<br>controls                                                                                                   | NA              | NA               | 32                | Mucosa                 | qPCR | U6                     | 1 | Up            | miR-301a                                                             | SNIP1                   | Disease<br>severity              |
| <b>Markus Gwiggner 2018</b> | Active<br>UC           | 54.55/45<br>.45                                | 47.3 (22-<br>85)                      | 11                | Healthy<br>controls                                                                                                   | 54.55/45<br>.45 | 56.1 (46-<br>78) | 11                | Mucosa                 | qPCR | RNU44                  | 4 | Up or<br>down | Up: miR-31-5p,<br>miR-155-5p,<br>miR-183-5p,<br>down: miR-324-<br>3p | IL13R<br>A              | IBD type,<br>disease<br>severity |
| <b>Jing Guo 2017</b>        | IBD                    | 87.50/12<br>.50                                | 3.5-14                                | UC: 3,<br>CD: 5   | Normal<br>colon<br>tissues from<br>patients who<br>had<br>undergone<br>intestinal<br>surgery for<br>other<br>diseases | 62.50/37<br>.50 | 2.75-10          | 8                 | Mucosa                 | qPCR | U6                     | 1 | Up            | miR-7-5p                                                             | TFF3                    | NA                               |
| <b>Sezin Günaltay 2014</b>  | UC                     | 87.50/12<br>.50                                | 56.38 (33-<br>79)                     | 16                | Non-IBD                                                                                                               | 54.55/45<br>.45 | 58.6 (29-<br>88) | 11                | Mucosa                 | qPCR | U6, RNU44<br>and RNU48 | 3 | Up            | miR-146a, miR-<br>155, miR-21                                        | NA                      | Disease<br>severity              |
| <b>Y Chen 2013</b>          | Active<br>UC and<br>CD | NA                                             | NA                                    | UC: 11,<br>CD: 11 | Paired<br>adjacent<br>normal colon<br>tissues                                                                         | NA              | NA               | UC: 11,<br>CD: 11 | Mucosa                 | qPCR | U6                     | 1 | Down          | miR-200b                                                             | ZEB1                    | IBD type                         |
| <b>Xu-tao Lin 2018</b>      | Active<br>CD           | NA                                             | NA                                    | 18                | Paired<br>adjacent<br>normal colon<br>tissues                                                                         | NA              | NA               | 18                | Mucosa                 | qPCR | U6                     | 1 | Up            | miR-143                                                              | ATG2<br>B               | NA                               |
| <b>Tanzhou Chen 2017</b>    | IBD                    | NA                                             | NA                                    | 20                | Non-IBD                                                                                                               | NA              | NA               | 5                 | Mucosa                 | qPCR | NA                     | 1 | Up            | miR-126                                                              | S1PR<br>2               | NA                               |



|                                      |                                     |                                  |                                                                                            |                |                      |             |              |    |                                      |      |         |   |      |                           |       |                            |
|--------------------------------------|-------------------------------------|----------------------------------|--------------------------------------------------------------------------------------------|----------------|----------------------|-------------|--------------|----|--------------------------------------|------|---------|---|------|---------------------------|-------|----------------------------|
| <b>Bin Chen 2013</b>                 | Active UC                           | 62.5/37.5                        | 36.5 (19-51)                                                                               | 24             | Healthy controls     | 60/40       | 32.4 (21-48) | 10 | Mucosa                               | qPCR | U6      | 1 | Down | miR-19a                   | TNF-a | NA                         |
| <b>Chong He 2017</b>                 | IBD                                 | NA                               | NA                                                                                         | UC: 72, CD: 81 | Healthy controls     | NA          | NA           | 35 | Mucosa (intestinal epithelial cells) | qPCR | U6      | 1 | Up   | miR-301a                  | BTG1  | IBD type, disease severity |
| <b>Nóra J. Béres 2016 (Cohort 1)</b> | CD                                  | 50/50                            | 14.73±0.58                                                                                 | 12             | Healthy controls     | 68.75/31.25 | 10.56±1.36   | 16 | FFPE                                 | qPCR | U6      | 3 | Up   | miR-146, miR-155, miR-122 | NA    | Disease severity           |
| <b>Nóra J. Béres 2016 (Cohort 2)</b> | Active UC and Active or inactive CD | UC: 60/40, CD: 44.74/55.26       | UC: 11.8±1.75, active CD: 12.92±1.13, inactive CD: 12.86±1.6                               | UC: 10, CD: 38 | Healthy controls     | 69.57/30.43 | 8.57±1.09    | 23 | Mucosa                               | qPCR | U6      | 3 | Up   | miR-146, miR-155, miR-122 | NA    | IBD type, disease severity |
| <b>Nóra Judit Béres 2018</b>         | CD                                  | NA                               | Active: 12.19±1.2, inactive: 10.97±1.29                                                    | 33             | Non-colitis-controls | NA          | 6.48±1.1     | 20 | Mucosa                               | qPCR | U6      | 1 | Up   | miR-223                   | NA    | Disease severity           |
| <b>Natalya Benderska 2015</b>        | UC                                  | 40/60                            | 42.5±14.5                                                                                  | 10             | Healthy controls     | 46.67/53.33 | 41.6±31      | 15 | Mucosa                               | qPCR | U6      | 1 | Up   | miR-26b                   | DIP1  | NA                         |
| <b>Yugo Ando 2016</b>                | IBD                                 | UC: 73.68/26.32, CD: 58.82/41.18 | Active UC: 45.6±14.6, inactive UC: 49.7±14.2, active CD: 46.0±19.4, inactive CD: 37.2±15.9 | UC: 19, CD: 17 | Non-IBD              | 40/60       | 54.9±16.1    | 10 | Mucosa (CD3+ T cells)                | qPCR | SNORD95 | 1 | Down | miR-21                    | NA    | IBD type, disease severity |

|                                |           |                            |                                           |                |                                       |                                         |                                             |                              |                                                                            |      |          |   |      |                 |                          |                            |
|--------------------------------|-----------|----------------------------|-------------------------------------------|----------------|---------------------------------------|-----------------------------------------|---------------------------------------------|------------------------------|----------------------------------------------------------------------------|------|----------|---|------|-----------------|--------------------------|----------------------------|
| <b>Xiao Feng 2012</b>          | UC        | 40.91/59.09                | active: 48.8 (17-80), inactive: 37(25-58) | 22             | Healthy controls, IBS                 | Healthy controls: 46.7/53.3. IBS: 60/40 | Healthy controls: 47.1±54.61, IBS:40.2±38.3 | Healthy control: 15, IBS: 15 | Mucosa                                                                     | qPCR | U6       | 2 | Up   | miR-126, miR-21 | miR-126: IKBA, PLK2, CRK | Disease severity           |
| <b>Gao Chao 2019</b>           | IBD       | NA                         | NA                                        | UC: 31, CD: 37 | Healthy controls                      | NA                                      | NA                                          | 24                           | Blood (CD4 <sup>+</sup> C D25 <sup>+</sup> Fox p3 <sup>+</sup> Treg cells) | qPCR | U6       | 1 | Up   | miR-155         | CTLA-4                   | IBD type, disease severity |
| <b>Min Chen 2019</b>           | Active CD | 70/30                      | 31-51                                     | 10             | Normal tissue of anastomosis patients | 70/30                                   | 31-51                                       | 10                           | Surgery tissue                                                             | qPCR | NA       | 1 | Up   | miR-16-1        | HSP70                    | NA                         |
| <b>Richard K. Felwick 2019</b> | CD        | 47.83/52.17                | active: 32(17-66), inactive: 51(26-80)    | 23             | Healthy controls                      | 30/70                                   | 70 (49-86)                                  | 10                           | Mucosa (epithelial cells)                                                  | qPCR | RNU44    | 1 | Up   | miR-23a         | TNFAP3                   | Disease severity           |
| <b>Yingqi Shi 2019</b>         | IBD       | UC: 60/40, CD: 52/48       | UC: 38.77±9.21, CD: 34.15±7.68            | UC: 40, CD: 24 | Healthy controls                      | 52.31/47.69                             | 41.62±9.45                                  | 65                           | Mucosa, serum and PBMC                                                     | qPCR | NA       | 1 | Down | miR-10a         | NA                       | IBD type                   |
| <b>Artin Soroosh 2019</b>      | IBD       | NA                         | NA                                        | UC: 57, CD: 22 | Healthy controls                      | NA                                      | NA                                          | 26                           | Mucosa                                                                     | qPCR | U6       | 1 | Up   | miR-24          | NA                       | IBD type, disease severity |
| <b>CP Wu 2019</b>              | IBD       | UC: 57.14/42.86, CD: 50/50 | UC: 26-66, CD: 23-50                      | UC: 14, CD12   | Healthy controls                      | NA                                      | NA                                          | 30                           | Mucosa                                                                     | qPCR | U6       | 1 | Down | miR-375         | TLR4                     | IBD type                   |
| <b>Xiaohong Lu 2020</b>        | UC        | NA                         | NA                                        | 45             | Healthy controls                      | NA                                      | NA                                          | 45                           | Serum                                                                      | qPCR | U6       | 1 | Up   | miR-21-5p       | STAT3                    | NA                         |
| <b>Yan Shi 2020 (Cohort1)</b>  | IBD       | UC: 41.18/58.82, CD:       | UC: 47.6±2.92,                            | UC: 17, CD: 15 | Healthy controls                      | 42.86/57.14                             | 29.2±1.01                                   | 14                           | Mucosa                                                                     | qPCR | sNANA 5s | 1 | Down | miR-219a-5p     | NA                       | IBD type, disease severity |

|                                              |     |                                       |                                            |                   |                     |                 |                  |    |        |      |          |   |      |                                                                              |                                                              |                                                  |
|----------------------------------------------|-----|---------------------------------------|--------------------------------------------|-------------------|---------------------|-----------------|------------------|----|--------|------|----------|---|------|------------------------------------------------------------------------------|--------------------------------------------------------------|--------------------------------------------------|
|                                              |     | 66.67/33<br>.33                       | CD:<br>37.5±3.23                           |                   |                     |                 |                  |    |        |      |          |   |      |                                                                              |                                                              |                                                  |
| <b>Yan Shi 2020 (Cohort2)</b>                | IBD | UC:<br>55.56/44<br>.44, CD:<br>60/40  | UC:<br>46.8±4.31,<br>CD:<br>38.8±3.25      | UC: 18,<br>CD: 15 | Healthy<br>controls | 56.52/43<br>.48 | 29.33±1.1<br>3   | 23 | Blood  | qPCR | sNANA 5s | 1 | Down | miR-219a-5p                                                                  | NA                                                           | IBD type,<br>disease<br>severity                 |
| <b>Swati Valmiki 2020</b>                    | UC  | 66.67/33<br>.33                       | 37.02±11.<br>87                            | 48                | Non-IBD             | 80/20           | 38.25±13.<br>91  | 30 | Mucosa | qPCR | U6       | 2 | Up   | miR-125b, miR-<br>223                                                        | miR-<br>125bT<br>RAF6<br>and<br>A20,<br>miR-<br>223:<br>IKKα | NA                                               |
| <b>Dandan Zhao 2020</b>                      | IBD | NA                                    | NA                                         | 30                | Non-IBD             | NA              | NA               | 30 | Mucosa | qPCR | U6       | 1 | Up   | miR-449a                                                                     | Notch<br>1                                                   | NA                                               |
| <b>Friederike Cordes 2020</b>                | IBD | NA                                    | NA                                         | UC: 37,<br>CD: 40 | Healthy<br>controls | NA              | NA               | 19 | Blood  | qPCR | NA       | 1 | Up   | miR-320a                                                                     | NA                                                           | Disease<br>severity and<br>treatment<br>response |
| <b>Xiaozhi Deng 2020</b>                     | IBD | 50/50                                 | 9.4 (7-11)                                 | 30                | Non-IBD             | 50/50           | 8.8 (6-12)       | 30 | Mucosa | qPCR | U6       | 1 | Up   | miR-4262                                                                     | SIRT1                                                        | NA                                               |
| <b>Richard K. Felwick 2020</b>               | CD  | 47.83/52<br>.17                       | 38 (17-80)                                 | 23                | Healthy<br>controls | 30/70           | 70 (49-86)       | 10 | Mucosa | qPCR | RNU44    | 1 | Up   | miR-23a                                                                      | TNFAI<br>P3                                                  | NA                                               |
| <b>Malgorzata Guz 2020</b>                   | IBD | UC:<br>62.5/38.<br>5,<br>CD:50/5<br>0 | UC: 49.2<br>(23-27),<br>CD:45.3<br>(23-67) | UC: 16,<br>CD: 12 | Healthy<br>controls | 45.45/54<br>.55 | 59.4 (22-<br>88) | 11 | Mucosa | qPCR | NA       | 5 | Up   | miR-21-3p, miR-<br>31-3p, miR-<br>125b-1-3p, miR-<br>146a-3p, miR-<br>155-5p | NA                                                           | NA                                               |
| <b>Agnieszka Kempinska-Podhorodecka 2020</b> | UC  | 20/80                                 | 43.5±15                                    | 10                | Healthy<br>controls | 60/40           | 50±4             | 10 | Mucosa | qPCR | NA       | 1 | Down | miR-346                                                                      | NA                                                           | Primary<br>sclerosing<br>cholangitis             |
| <b>Mohammad Mirzakhani 2020</b>              | CD  | 52.17/47<br>.83                       | 37.04±10.<br>45                            | 23                | Healthy<br>controls | 50/50           | 36.9±10.6        | 30 | Blood  | qPCR | RNU48    | 2 | Up   | miR-21, miR-<br>146a                                                         | NA                                                           | Disease<br>severity                              |

|                                |           |                      |                             |               |                  |             |            |    |                 |      |            |   |            |                                    |        |                  |
|--------------------------------|-----------|----------------------|-----------------------------|---------------|------------------|-------------|------------|----|-----------------|------|------------|---|------------|------------------------------------|--------|------------------|
| <b>Mehri Naghdalipour 2020</b> | UC        | 52.2/47.8            | 58.09±6.27                  | 23            | Non-IBD          | 38.9/61.1   | 56.11±9.93 | 18 | Mucosa          | qPCR | miR-361-5p | 3 | Up or down | Up: miR-21, miR-433, down: miR-590 | NA     | NA               |
| <b>Xiaojuan Shao 2020</b>      | IBD       | 62/38                | NA                          | 50            | Healthy controls | 50/50       | NA         | 24 | Blood           | qPCR | NA         | 1 | Up         | miR-155                            | GPER 1 | Gender           |
| <b>Jun Yao 2020</b>            | IBD       | UC: 42/58, CD: 54/46 | UC: 35.1±6.45, CD: 32.8±7.3 | UC: 50, CD:50 | Healthy controls | 55/45       | 35±8.1     | 20 | Mucosa and PBMC | qPCR | U6         | 1 | Up         | miR-802                            | SOCS 5 | Disease severity |
| <b>Ting Yu 2020</b>            | Active UC | 61.29/38.71          | 38.6±6.2                    | 62            | Healthy controls | 61.29/38.71 | 38.7±6.1   | 62 | Plasma          | qPCR | NA         | 1 | Up         | miR-24                             | NA     | NA               |
| <b>Xiaojing Zhao 2020</b>      | CD        | NA                   | NA                          | 10            | Healthy controls | NA          | NA         | 8  | Mucosa          | qPCR | U6         | 1 | Up         | miR-124a                           | AHR    | NA               |

miRNA: microRNAs; IBD: Inflammatory bowel disease; UC: Ulcerative colitis; CD: Crohn's disease; y: years; SD: Standard deviation; PBMC: Peripheral blood mononuclear cell; FFPE: Formalin-fixed paraffin-embedded; qPCR: Quantitative real-time polymerase chain reaction; NA: Not available; Non: None of valid data.

**Table S4 Consistently up-regulated and down-regulated miRNAs that were reported in studies with microarray analysis.**

|                           | miRNA                       | No. of studies with same direction | Total number of IBD samples tested |    |
|---------------------------|-----------------------------|------------------------------------|------------------------------------|----|
| <b>Up-regulated miRNA</b> | miR-223                     | 10                                 | 376                                |    |
|                           | miR-21                      | 7                                  | 60                                 |    |
|                           | miR-155                     | 3                                  | 35                                 |    |
|                           | miR-708-5p                  | 3                                  | 33                                 |    |
|                           | miR-142                     | 2                                  | 66                                 |    |
|                           | miR-1246                    | 2                                  | 64                                 |    |
|                           | miR-16                      | 2                                  | 60                                 |    |
|                           | miR-27a                     | 3                                  | 45                                 |    |
|                           | miR-15b                     | 2                                  | 39                                 |    |
|                           | miR-144                     | 2                                  | 25                                 |    |
|                           | miR-30b                     | 2                                  | 19                                 |    |
|                           | miR-1973                    | 2                                  | 15                                 |    |
|                           | miR-451                     | 2                                  | 13                                 |    |
|                           | miR-106a                    | 2                                  | 12                                 |    |
|                           | miR-17                      | 2                                  | 10                                 |    |
|                           | miR-126                     | 2                                  | 9                                  |    |
|                           | miR-106b                    | 2                                  | 11                                 |    |
|                           | miR-15a                     | 2                                  | 8                                  |    |
|                           | <b>Down-regulated miRNA</b> | miR-192-5p                         | 3                                  | 64 |
|                           |                             | miR-4286                           | 2                                  | 11 |
| miR-4284                  |                             | 2                                  | 11                                 |    |

miRNA: microRNAs; No.: Number.

**Table S5 Consistently up-regulated and down-regulated miRNAs that were reported in studies with validated methods.**

|                           | miRNA                       | No. of studies with same direction | Total number of IBD samples tested |
|---------------------------|-----------------------------|------------------------------------|------------------------------------|
| <b>Up-regulated miRNA</b> | miR-155                     | 11                                 | 493                                |
|                           | miR-31                      | 9                                  | 429                                |
|                           | miR-21                      | 9                                  | 396                                |
|                           | miR-223                     | 5                                  | 121                                |
|                           | miR-126                     | 4                                  | 276                                |
|                           | miR-23a                     | 3                                  | 262                                |
|                           | miR-122                     | 3                                  | 70                                 |
|                           | miR-146a                    | 3                                  | 49                                 |
|                           | miR-301a                    | 2                                  | 291                                |
|                           | miR-362                     | 2                                  | 280                                |
|                           | miR-106a                    | 2                                  | 280                                |
|                           | miR-143                     | 2                                  | 234                                |
|                           | miR-16                      | 2                                  | 226                                |
|                           | miR-24                      | 2                                  | 141                                |
|                           | miR-320a                    | 2                                  | 92                                 |
|                           | miR-146                     | 2                                  | 60                                 |
|                           | miR-124                     | 2                                  | 30                                 |
|                           | miR-132                     | 2                                  | 43                                 |
|                           | miR-206                     | 2                                  | 41                                 |
|                           | <b>Down-regulated miRNA</b> | miR-141                            | 4                                  |
| miR-200b                  |                             | 3                                  | 84                                 |
| miR-200a                  |                             | 2                                  | 62                                 |
| miR-200c                  |                             | 2                                  | 62                                 |

miRNA: microRNAs; No.: Number.

**Table S6 Results of meta-regression analysis.**

| <b>Var</b>        | <b>Coeff.</b> | <b>Std. Err.</b> | <b>P value</b> | <b>RDOR</b> | <b>95%CI</b>   |
|-------------------|---------------|------------------|----------------|-------------|----------------|
| <b>Cte.</b>       | -0.741        | 1.0584           | 0.4895         | —           | —              |
| <b>S</b>          | -0.15         | 0.145            | 0.3103         | —           | —              |
| <b>IBD type</b>   | -0.639        | 0.3007           | 0.0419         | 0.53        | (0.29 - 0.98)  |
| <b>Age</b>        | 0.558         | 0.4115           | 0.1856         | 1.75        | (0.75 - 4.05)  |
| <b>Sample</b>     | 1.473         | 0.6325           | 0.0268         | 4.36        | (1.20 - 15.88) |
| <b>miRNAassay</b> | 1.861         | 0.5804           | 0.0032         | 6.43        | (1.96 - 21.03) |
| <b>Control</b>    | 1.587         | 0.3876           | 0.0003         | 4.89        | (2.22 - 10.79) |

No. studies =37

Filter OFF

Add 1/2 to all cells of the studies with zero

IBD type: UC versus CD, age of participants: pediatric population (<18 years of age) versus adult ( $\geq$ 18 years of age), sample source: blood versus others, method of quantifying miRNA expression (miRNAassay): qPCR versus only microarray and control: healthy controls versus non-IBD controls.

Abbreviations: miRNA = microRNAs; CI = confidence interval; Coeff. = coefficient; Std. Err. = standard error; RDOR = relative diagnostic odds ratios.

Tau-squared estimate = 0.5749 (Convergence is achieved after 9 iterations)

Restricted Maximum Likelihood estimation (REML)

**Table S7 Results of sensitivity analysis.**

| <b>StudyID</b>                            | <b>Sensitivity (95%CI)</b> | <b>Specificity (95%CI)</b> | <b>PLR (95%CI)</b> | <b>NLR (95%CI)</b> | <b>DOR (95%CI)</b>  |
|-------------------------------------------|----------------------------|----------------------------|--------------------|--------------------|---------------------|
| <b>Adam M. Zahm 2011</b>                  | 0.82 (0.80-0.84)           | 0.83 (0.80-0.85)           | 4.03 (3.03-5.37)   | 0.24 (0.17-0.34)   | 21.06 (11.80-37.57) |
| <b>Adam M. Zahm 2014</b>                  | 0.81 (0.79-0.82)           | 0.84 (0.82-0.86)           | 4.71 (3.64-6.10)   | 0.26 (0.21-0.33)   | 23.45 (14.93-36.84) |
| <b>Chenming Sun 2017</b>                  | 0.81 (0.79-0.82)           | 0.85 (0.83-0.87)           | 4.44 (3.55-5.54)   | 0.26 (0.21-0.32)   | 22.43 (14.47-34.77) |
| <b>Christos Polytarchou 2015</b>          | 0.81 (0.79-0.83)           | 0.85 (0.83-0.87)           | 4.96 (3.80-6.46)   | 0.25 (0.20-0.32)   | 25.50 (16.21-40.12) |
| <b>Katharina Schönauen 2018</b>           | 0.80 (0.79-0.82)           | 0.84 (0.82-0.86)           | 4.41 (3.46-5.63)   | 0.26 (0.21-0.33)   | 21.20 (13.77-32.62) |
| <b>Matthias Hübenthal 2015</b>            | 0.80 (0.78-0.81)           | 0.83 (0.81-0.85)           | 4.20 (3.33-5.30)   | 0.27 (0.22-0.33)   | 19.50 (13.02-29.19) |
| <b>Mengdie Shen 2019</b>                  | 0.80 (0.78-0.82)           | 0.84 (0.82-0.86)           | 4.51 (3.51-5.80)   | 0.27 (0.22-0.33)   | 21.37 (13.80-33.08) |
| <b>Michael D. Jensen 2015</b>             | 0.81 (0.80-0.83)           | 0.84 (0.82-0.86)           | 4.58 (3.59-5.84)   | 0.26 (0.21-0.32)   | 22.43 (14.88-33.81) |
| <b>Olfat G. Shaker 2019</b>               | 0.80 (0.79-0.82)           | 0.83 (0.81-0.85)           | 4.28 (3.40-5.40)   | 0.27 (0.22-0.33)   | 19.88 (13.16-30.04) |
| <b>Peng Chen 2019 (training cohort)</b>   | 0.81 (0.79-0.83)           | 0.84 (0.82-0.86)           | 4.49 (3.49-5.77)   | 0.26 (0.21-0.33)   | 22.10 (14.07-34.73) |
| <b>Peng Chen 2019 (validation cohort)</b> | 0.81 (0.80-0.83)           | 0.84 (0.82-0.86)           | 4.38 (3.43-5.58)   | 0.26 (0.21-0.32)   | 21.54 (13.95-33.27) |
| <b>Radha Duttagupta 2012</b>              | 0.80 (0.78-0.82)           | 0.84 (0.82-0.86)           | 4.36 (3.42-5.56)   | 0.27 (0.22-0.33)   | 20.40 (13.37-31.12) |
| <b>Yulan Ye 2017</b>                      | 0.80 (0.79-0.82)           | 0.84 (0.82-0.86)           | 4.54 (3.55-5.81)   | 0.26 (0.21-0.33)   | 21.96 (14.24-33.86) |
| <b>Elham Ahmed Hassan 2020</b>            | 0.80 (0.78-0.82)           | 0.83 (0.81-0.85)           | 4.18 (3.31-5.28)   | 0.27 (0.22-0.34)   | 19.23 (12.65-29.24) |
| <b>Yuanyuan Tian 2020</b>                 | 0.76 (0.74-0.78)           | 0.85 (0.83-0.87)           | 4.52 (3.44-5.94)   | 0.30 (0.26-0.35)   | 17.08 (11.81-24.71) |
| <b>Rui Zhou 2021</b>                      | 0.81 (0.79-0.82)           | 0.84 (0.82-0.86)           | 4.36 (3.39-5.62)   | 0.26 (0.21-0.33)   | 21.46 (13.64-33.76) |

95%CI: 95% confidence interval; PLR: Positive likelihood ratio; NLR: Negative likelihood ratio; DOR: Diagnostic odds ratio.
